# Supplementary material for: Exposure Pathways of Nontuberculous Mycobacteria Through Soil, Streams, and Groundwater, Hawai'i, USA
Source: PubMed Central journal article supplement (PMC8025848; doi:10.1029/2020gh000350), 2021-04-01
Supplement: GH2-5-e2020GH000350-s001.pdf [file GH2-5-e2020GH000350-s001.pdf]

**Exposure Pathways of Nontuberculous Mycobacteria Through Soil, Streams, and Groundwater, Hawai'i, USA**

[Stephen T. Nelson<sup>\*1</sup>, Schuyler Robinson<sup>1</sup>, Kevin Rey<sup>1</sup>, Leeza Brown<sup>1</sup>, Norm Jones<sup>2</sup>, Stephanie N. Dawrs<sup>3</sup>, Ravleen Viridi<sup>3</sup>, Grant J. Norton<sup>3</sup>, L. Elaine Epperson<sup>3</sup>, Nabeeh A. Hasan<sup>3</sup>, Edward D. Chan<sup>4,5,6</sup>, Michael Strong<sup>3</sup>, Jennifer R. Honda<sup>3</sup>

<sup>1</sup>Department of Geological Sciences, Brigham Young University

<sup>2</sup>Department of Civil and Environmental Engineering, Brigham Young University

<sup>3</sup>Center for Genes, Environment, and Health, National Jewish Health

<sup>4</sup>Medicine and Academic Affairs, National Jewish Health

<sup>5</sup>Division of Pulmonary Sciences and Critical Care Medicine, University of Colorado Anschutz Medical Campus

<sup>6</sup>Department of Medicine, Rocky Mountain Regional Denver Veterans Affairs Medical Center

**Contents of this file**

Table S1

**Additional Supporting Information (Files uploaded separately)**

Captions for Datasets S1: *Details for the stream (and 1 reservoir) sampling events on Oahu and Kauai, Hawaii, summer 2018. UTM Zone 4, NAD83.*

**Introduction**

The following Table gives sample locations, dates, and times for stream samples discussed in this article. They are included as Supporting Information to: a) decrease the manuscript length, and b) enable the interested reader to locate or revisit these sites as desired.

---

\* Corresponding author ;Dept. of Geological Sciences, S-389 ESC, Brigham Young University, Provo, UT 84602; [oxygen.isotope@gmail.com](mailto:oxygen.isotope@gmail.com); 801-722-5387

Table S1B. Details for the stream (and 1 reservoir) sampling events on Oahu and Kauai, Hawaii, summer 2018. UTM Zone 4, NAD83.

| Sample name                       | Locality/sample type       | Sample date   | Easting | Northing |
|-----------------------------------|----------------------------|---------------|---------|----------|
| <i>Oahu January 2018 samples</i>  |                            |               |         |          |
| 18-STR-1                          | Manoa Falls Stream         | 1/22/18 11:44 | 624357  | 2359606  |
| 18-STR-2                          | Nuuanu Stream              | 1/22/18 13:50 | 622282  | 2360954  |
| 18-STR-3                          | Kalihi Stream              | 1/22/18 15:09 | 618917  | 2362389  |
| 18-STR-6                          | Waimea Stream              | 1/23/18 11:47 | 597716  | 2392801  |
| 18-STR-7                          | Kahana Stream              | 1/23/18 15:16 | 615738  | 2382418  |
| 18-STR-9                          | Palolo Stream              | 1/24/18 13:56 | 625672  | 2356598  |
| 18-STR-10                         | Waiawa Stream/ditch        | 1/25/18 9:54  | 604612  | 2370911  |
| 18-STR-11                         | Waimano Stream             | 1/25/18 12:00 | 609421  | 2369359  |
| 18-STR-12                         | Wahiawa Reservoir          | 1/25/18 13:18 | 598410  | 2377329  |
| 18-STR-13                         | Maunawili Stream           | 1/26/18 10:03 | 628078  | 2362678  |
| 18-STR-14                         | Maunawili tributary stream | 1/26/18 11:13 | 627800  | 2362753  |
| 18-STR-15                         | Heeia Stream               | 1/26/18 14:04 | 622133  | 2368077  |
| 18-STR-16                         | Waikane Stream             | 1/26/18 15:55 | 619040  | 2377046  |
| 18-STR-17                         | Kaunala Loop Trail Stream  | 1/27/18 13:25 | 602436  | 2393916  |
| <i>Oahu February 2018 samples</i> |                            |               |         |          |
| 18-KAR-1                          | Manoa Falls Stream         | 2/20/18 16:19 | 624359  | 2359611  |
| 18-KAR-2                          | Nuuanu Stream              | 2/20/18 17:22 | 622283  | 2360952  |
| 18-KAR-3                          | Kalihi Stream              | 2/21/18 14:38 | 618905  | 2362376  |
| 18-KAR-6                          | Waimea Stream              | 2/20/18 10:35 | 597600  | 2392897  |
| 18-KAR-7                          | Kahana Stream              | 2/19/18 10:14 | 615697  | 2382402  |
| 18-KAR-9                          | Palolo Stream              | 2/20/18 15:22 | 625685  | 2356576  |
| 18-KAR-11                         | Waimano Stream             | 2/20/18 13:20 | 609416  | 2369363  |
| 18-KAR-12                         | Wahiawa Reservoir          | 2/20/18 11:41 | 598416  | 2377271  |
| 18-KAR-13                         | Maunawili Stream           | 2/19/18 13:43 | 628076  | 2362682  |
| 18-KAR-14                         | Maunawili tributary stream | 2/20/18 14:09 | 627802  | 2362769  |
| 18-KAR-15                         | Heeia Stream               | 2/19/18 12:46 | 622112  | 2368076  |
| 18-KAR-16                         | Waikane Stream             | 2/19/18 11:35 | 619046  | 2377042  |
| 18-KAR-17                         | Kaunala Loop Trail stream  | 2/20/18 8:45  | 602443  | 2393928  |
| 18-KAR-18                         | Herring Springs            | 2/21/18 15:40 | 622191  | 2358769  |
| <i>Oahu August 2018 samples</i>   |                            |               |         |          |
| 18-KRM-01                         | Manoa Falls Stream         | 8/2/18 18:55  | 624343  | 2359618  |
| 18-KRM-02                         | Nuuanu Stream              | 8/3/18 12:42  | 622296  | 2360950  |
| 18-KRM-03                         | Kalihi Stream              | 8/3/18 14:46  | 618898  | 2362391  |
| 18-KRM-06                         | Waimea Stream              | 8/4/18 10:19  | 597605  | 2392906  |
| 18-KRM-07                         | Kahana Stream              | 8/7/18 12:03  | 615700  | 2382401  |
| 18-KRM-09                         | Palolo Stream              | 8/2/18 14:52  | 625681  | 2356572  |
| 18-KRM-11                         | Waimano Stream             | 8/2/18 11:23  | 609416  | 2369365  |
| 18-KRM-12                         | Wahiawa Reservoir          | 8/6/18 10:16  | 598415  | 2377330  |
| 18-KRM-13                         | Maunawili Stream           | 8/3/18 10:31  | 628068  | 2362661  |
| 18-KRM-14                         | Maunawili tributary stream | 8/3/18 11:20  | 627793  | 2362765  |
| 18-KRM-15                         | Heeia Stream               | 8/3/18 15:57  | 622145  | 2368074  |
| 18-KRM-16                         | Waikane Stream             | 8/7/18 13:51  | 619040  | 2377030  |

|                                       |                           |                  |        |         |
|---------------------------------------|---------------------------|------------------|--------|---------|
| 18-KRM-17                             | Kaunala Loop Trail stream | 8/6/18 16:25     | 602449 | 2393932 |
| 18-KRM-18                             | Herring Springs           | 8/2/18 16:23     | 622192 | 2358768 |
| 18-KRM-19                             | Kamananui Stream          | 8/4/18 13:43     | 598686 | 2392296 |
| 18-KRM-20                             | Kaiwikoele Stream         | 8/4/18 15:12     | 598602 | 2392258 |
| <i>Oahu August 2019 samples</i>       |                           |                  |        |         |
| 19-KAR-1                              | Manoa Falls Stream        | July 26-31, 2019 | 624359 | 2359611 |
| 19-KAR-2                              | Nuuanu Stream             | July 26-31, 2019 | 622283 | 2360952 |
| 19-KAR-3                              | Kalihi Stream             | July 26-31, 2019 | 618905 | 2362376 |
| 19-KAR-6                              | Waimea Stream             | July 26-31, 2019 | 597605 | 2392906 |
| 19-KAR-7                              | Kahana Stream             | July 26-31, 2019 | 615697 | 2382402 |
| 19-KAR-11                             | Waimano Stream            | July 26-31, 2019 | 609416 | 2369365 |
| 19-KAR-12                             | Wahiawa Reservoir         | July 26-31, 2019 | 598415 | 2377330 |
| 19-KAR-13                             | Maunawili Stream          | July 26-31, 2019 | 628068 | 2362661 |
| 19-KAR-15                             | Heeia Stream              | July 26-31, 2019 | 622145 | 2368074 |
| 19-KAR-16                             | Waikane Stream            | July 26-31, 2019 | 619040 | 2377030 |
| 19-KAR-17                             | Kaunala Loop Trail stream | July 26-31, 2019 | 602449 | 2393932 |
| 19-KAR-18                             | Herring Springs           | July 26-31, 2019 | 622192 | 2358768 |
| <i>Kauai July-August 2018 samples</i> |                           |                  |        |         |
| 18-Kau-19                             | Waiakoali Stream          | 7/31/18 16:56    | 435837 | 2446770 |
| 18-Kau-20                             | Kawaikoi Stream           | 7/31/18 17:10    | 435893 | 2447521 |
| 18-Kau-25                             | Mohihi Stream             | 8/2/18 14:47     | 437986 | 2445886 |
| 18-Kau-26                             | Unnamed stream 1          | 8/2/18 16:51     | 435166 | 2447559 |
| 18-Kau-27                             | Kauaikinana Stream        | 8/2/18 17:33     | 434908 | 2447662 |
| 18-Kau-34                             | Waimea River              | 8/3/18 14:49     | 432114 | 2430721 |
| <i>Kauai July 2019 samples</i>        |                           |                  |        |         |
| 19-Kau-1                              | Waimea River upstream     | 7/21/19          | 433797 | 2439987 |
| 19-Kau-2                              | Unnamed stream 2          | 7/21/19          | 433616 | 2439999 |
| 19-Kau-3                              | Mohihi Stream             | 7/22/19          | 437980 | 2445881 |
| 19-Kau-4                              | Waiakoali Stream          | 7/22/19          | 435827 | 2446775 |
| 19-Kau-5                              | Kawaikoi Stream           | 7/22/19          | 435899 | 2447499 |
| 19-Kau-6                              | Unnamed stream 1          | 7/22/19          | 435145 | 2447553 |
| 19-Kau-7                              | Kauaikinana Stream        | 7/22/19          | 434931 | 2447659 |
| 19-Kau-8                              | Waimea River              | 7/22/19          | 432121 | 2430699 |
| 19-Kau-9                              | Hanalei River             | 7/22/19          | 450989 | 2456044 |
